# Supplementary material for: The subthreshold-active KV7 current regulates neurotransmission by limiting spike-induced Ca2+ influx in hippocampal mossy fiber synaptic terminals
Source: PubMed Central journal article supplement (PMC6486593; doi:10.1038/s42003-019-0408-4), 2019-04-26
Supplement: 42003_2019_408_MOESM1_ESM.pdf [file 42003_2019_408_MOESM1_ESM.pdf]

## Supplementary Figure 1

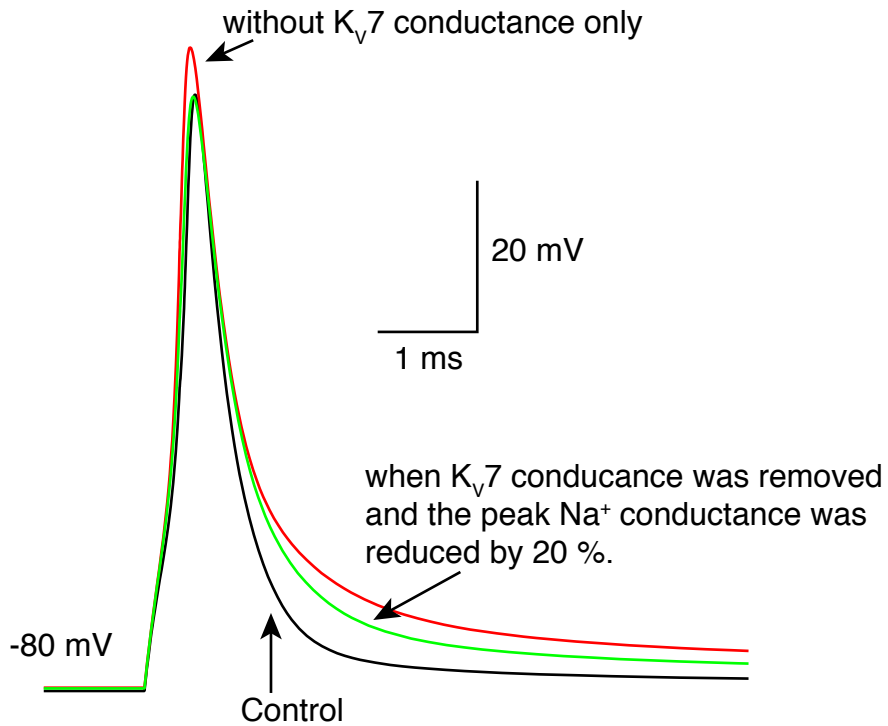

**Supplementary Fig 1:** A simulated single action potential elicited with a 30 pA, 0.35 ms current injection under control conditions (black) and when the  $K_v7$  conductance was removed (red). The action potential amplitude when the  $K_v7$  conductance was removed was enhanced and this could be restored to control conditions by reducing the peak  $Na^+$  conductance by 20 % as illustrated in green.

**Supplementary Table 1.**

|                                                           | ADP Amplitude (mV)     |                        | ADP decay time constant (ms) |                         |
|-----------------------------------------------------------|------------------------|------------------------|------------------------------|-------------------------|
|                                                           | 1 <sup>st</sup> AP     | 20 <sup>th</sup> AP    | 1 <sup>st</sup> AP           | 20 <sup>th</sup> AP     |
| Control 1 Hz                                              | 6.49 ± 1.03<br>(n=8)   | 6.72 ± 0.93<br>(n=8)   | 66.43 ± 6.54<br>(n=7)        | 67.71 ± 5.92<br>(n=7)   |
| +XE991 1 Hz                                               | 10.44 ± 1.18*<br>(n=8) | 10.18 ± 0.96*<br>(n=8) | 115.43 ± 10.75*<br>(n=7)     | 112.86 ± 9.03*<br>(n=7) |
| Control 1 Hz                                              | 9.90 ± 1.30<br>(n=4)   | 9.33 ± 1.79<br>(n=4)   | 51.49 ± 15.14<br>(n=3)       | 44.64 ± 9.99<br>(n=4)   |
| +Linopirdine 1 Hz                                         | 15.42 ± 2.11*<br>(n=4) | 17.73 ± 3.75*<br>(n=4) | 69.50 ± 17.53*<br>(n=4)      | 68.03 ± 18.57*<br>(n=4) |
| Control 5 Hz                                              | 6.52 ± 0.83<br>(n=8)   | 6.37 ± 0.84<br>(n=8)   | 58.14 ± 6.31<br>(n=7)        | 55.14 ± 5.57<br>(n=7)   |
| +XE991 5 Hz                                               | 9.79 ± 1.09*<br>(n=8)  | 9.18 ± 1.13*<br>(n=8)  | 107.43 ± 9.52*<br>(n=7)      | 105.00 ± 9.05*<br>(n=7) |
| Control 5 Hz                                              | 9.84 ± 1.03<br>(n=4)   | 12.58 ± 1.28<br>(n=4)  | 28.77 ± 8.24<br>(n=4)        | 38.72 ± 12.96<br>(n=4)  |
| +Linopirdine 5 Hz                                         | 19.69 ± 2.25*<br>(n=4) | 20.56 ± 2.35*<br>(n=4) | 61.92 ± 20.62*<br>(n=4)      | 60.24 ± 17.39*<br>(n=4) |
| BAPTA 1 Hz                                                | 1.57 ± 1.21<br>(n=11)  | 1.72 ± 1.44<br>(n=11)  | 35.36 ± 21.70<br>(n=11)      | 36.64 ± 22.56<br>(n=11) |
| +XE991 1 Hz                                               | 1.89 ± 2.14<br>(n=11)  | 1.94 ± 2.67<br>(n=11)  | 32.27 ± 21.34<br>(n=11)      | 31.82 ± 21.73<br>(n=11) |
| BAPTA 5 Hz                                                | 1.88 ± 1.80<br>(n=11)  | 1.84 ± 1.78<br>(n=11)  | 35.73 ± 25.19<br>(n=11)      | 37.09 ± 25.50<br>(n=11) |
| +XE991 5 Hz                                               | 1.74 ± 1.71<br>(n=11)  | 1.94 ± 1.87<br>(n=11)  | 31.27 ± 24.31<br>(n=11)      | 31.64 ± 25.60<br>(n=11) |
| Control 1 Hz                                              | 9.72 ± 0.66<br>(n=6)   | 10.14 ± 0.82<br>(n=6)  | 98.17 ± 20.54<br>(n=6)       | 111.00 ± 22.44<br>(n=6) |
| +XE991 and N/P/Q Ca <sup>2+</sup> channel inhibitors 1 Hz | 3.85 ± 0.62*<br>(n=6)  | 3.92 ± 0.70*<br>(n=6)  | 45.67 ± 6.20*<br>(n=6)       | 43.00 ± 3.94*<br>(n=6)  |
| Control 5 Hz                                              | 10.26 ± 0.75<br>(n=6)  | 10.55 ± 1.08<br>(n=6)  | 94.67 ± 20.14<br>(n=6)       | 114.33 ± 24.02<br>(n=6) |
| +XE991 and N/P/Q Ca <sup>2+</sup> channel inhibitors 5 Hz | 4.17 ± 0.58*<br>(n=6)  | 4.10 ± 0.40*<br>(n=6)  | 47.17 ± 5.82*<br>(n=6)       | 49.17 ± 6.17*<br>(n=6)  |

**Supplementary Table 1:** The mean and standard error of mean values for the amplitude and decay time constant of the ADP following either the 1<sup>st</sup> or 20<sup>th</sup> action potential (AP) in train elicited at 1 Hz or 5 Hz under control conditions or when BAPTA (10 mM or 20 mM) was incorporated in the patch pipette and after subsequent application of 3 μM XE991 or 10 μM Linopirdine or 3 μM XE991 together with 100 nM ω-conotoxin GVIA and 100 nM ω-agatoxin IVA. The numbers of observations are shown in parenthesis. Asterisks (\*) indicate significance at p < 0.05 when compared with the appropriate controls.

**Supplementary Table 2.**

|                              | AP Amplitude (mV)  |                     | AP Half-width (ms) |                     |
|------------------------------|--------------------|---------------------|--------------------|---------------------|
|                              | 1 <sup>st</sup> AP | 20 <sup>th</sup> AP | 1 <sup>st</sup> AP | 20 <sup>th</sup> AP |
| Control 1 Hz<br>(n=8)        | 65.52 ± 4.18       | 64.59 ± 3.00        | 0.85 ± 0.05        | 0.86 ± 0.05         |
| +XE991 1 Hz<br>(n=8)         | 57.47 ± 2.92*      | 58.60 ± 3.89*       | 1.04 ± 0.10*       | 1.09 ± 0.10*        |
| Control 1 Hz<br>(n=4)        | 60.26 ± 2.33       | 63.21 ± 2.64        | 1.23 ± 0.13        | 1.24 ± 0.13         |
| +Linopirdine 1 Hz<br>(n=4)   | 49.68 ± 0.83*      | 48.82 ± 1.80*       | 1.37 ± 0.17*       | 1.36 ± 0.15*        |
| Control 5 Hz<br>(n=8)        | 66.31 ± 2.27       | 61.02 ± 2.35        | 0.85 ± 0.05        | 0.97 ± 0.05         |
| +XE991 5 Hz<br>(n=8)         | 58.17 ± 2.66*      | 55.73 ± 2.25*       | 1.07 ± 0.10*       | 1.18 ± 0.09*        |
| Control 5 Hz<br>(n=4)        | 60.71 ± 3.60       | 61.87 ± 3.51        | 1.24 ± 0.12        | 1.28 ± 0.13         |
| +Linopirdine 5 Hz<br>(n=4)   | 50.20 ± 2.19*      | 46.68 ± 0.98*       | 1.39 ± 0.15*       | 1.44 ± 0.17*        |
| Control 20 Hz<br>(n=8)       | 63.20 ± 2.64       | 60.10 ± 2.67        | 0.83 ± 0.05        | 0.99 ± 0.05         |
| +XE991 20 Hz<br>(n=8)        | 56.70 ± 1.58*      | 53.53 ± 2.21*       | 1.08 ± 0.10*       | 1.16 ± 0.09*        |
| Control 20 Hz<br>(n=4)       | 64.37 ± 2.73       | 61.10 ± 4.36        | 1.30 ± 0.13        | 1.39 ± 0.11         |
| +Linopirdine 20 Hz<br>(n=4)  | 46.72 ± 1.20*      | 43.69 ± 4.07*       | 1.46 ± 0.13        | 1.67 ± 0.17         |
| Control 50 Hz<br>(n=8)       | 66.87 ± 3.18       | 55.56 ± 3.22        | 1.07 ± 0.11        | 1.13 ± 0.07         |
| +XE991 50 Hz<br>(n=8)        | 60.01 ± 2.66*      | 50.57 ± 3.01*       | 1.26 ± 0.07*       | 1.50 ± 0.07*        |
| Control 50 Hz<br>(n=4)       | 60.90 ± 1.59       | 58.03 ± 2.74        | 1.29 ± 0.14        | 1.60 ± 0.16         |
| +Linopirdine 50 Hz<br>(n=4)  | 46.97 ± 3.87*      | 42.50 ± 1.75*       | 1.50 ± 0.14*       | 1.77 ± 0.20*        |
| Control 100 Hz<br>(n=8)      | 63.86 ± 3.20       | 51.74 ± 3.13        | 0.79 ± 0.04        | 1.08 ± 0.05         |
| +XE991 100 Hz<br>(n=8)       | 58.10 ± 3.22*      | 43.34 ± 2.03*       | 1.00 ± 0.09*       | 1.22 ± 0.08*        |
| Control 100 Hz<br>(n=4)      | 61.64 ± 2.07       | 55.73 ± 4.28        | 1.30 ± 0.13        | 1.43 ± 0.13         |
| +Linopirdine 100 Hz<br>(n=4) | 47.51 ± 0.98*      | 35.92 ± 3.44*       | 1.51 ± 0.13*       | 1.85 ± 0.17*        |
| BAPTA 1 Hz<br>(n=11)         | 91.18 ± 2.91       | 90.36 ± 3.03        | 2.45 ± 0.23        | 4.32 ± 1.58         |
| +XE991 1 Hz<br>(n=11)        | 91.45 ± 3.13       | 91.21 ± 3.43        | 2.65 ± 0.27        | 4.52 ± 1.57         |
| BAPTA 5 Hz<br>(n=11)         | 90.18 ± 2.78       | 88.91 ± 2.96        | 2.53 ± 0.24        | 4.50 ± 1.56         |

|                                                                               |               |               |             |             |
|-------------------------------------------------------------------------------|---------------|---------------|-------------|-------------|
| +XE991 5 Hz<br>(n=11)                                                         | 91.63 ± 3.11  | 90.18 ± 3.32  | 2.74 ± 0.28 | 4.81 ± 1.54 |
| BAPTA 20 Hz<br>(n=11)                                                         | 90.91 ± 2.68  | 85.64 ± 2.71  | 2.53 ± 0.25 | 4.75 ± 1.54 |
| +XE991 20 Hz<br>(n=11)                                                        | 91.18 ± 2.79  | 86.09 ± 2.36  | 2.72 ± 0.26 | 4.96 ± 1.52 |
| BAPTA 50 Hz<br>(n=11)                                                         | 90.68 ± 2.44  | 82.14 ± 2.41  | 2.37 ± 0.22 | 4.68 ± 1.54 |
| +XE991 50 Hz<br>(n=11)                                                        | 91.09 ± 2.48  | 79.22 ± 2.25  | 2.77 ± 0.31 | 4.95 ± 1.52 |
| BAPTA 100 Hz<br>(n=11)                                                        | 90.45 ± 3.15  | 63.82 ± 3.55  | 2.40 ± 0.22 | 4.74 ± 1.54 |
| +XE991 100 Hz<br>(n=11)                                                       | 88.45 ± 3.62  | 65.36 ± 3.00  | 2.64 ± 0.29 | 4.85 ± 1.53 |
| Control 1 Hz<br>(n=4)                                                         | 83.25 ± 6.80  | 82.75 ± 6.55  | 2.48 ± 0.38 | 2.88 ± 0.24 |
| +XE991 and<br>N/P/Q Ca <sup>2+</sup><br>channel<br>inhibitors 1 Hz<br>(n=4)   | 76.75 ± 6.37* | 74.50 ± 7.08* | 3.10 ± 0.39 | 2.85 ± 0.68 |
| Control 5 Hz<br>(n=6)                                                         | 94.67 ± 3.97  | 93.00 ± 3.55  | 2.30 ± 0.28 | 2.70 ± 0.28 |
| +XE991 and<br>N/P/Q Ca <sup>2+</sup><br>channel<br>inhibitors 5 Hz<br>(n=6)   | 89.00 ± 3.72* | 87.33 ± 3.31* | 2.48 ± 0.24 | 2.87 ± 0.24 |
| Control 20 Hz<br>(n=6)                                                        | 92.83 ± 3.38  | 85.86 ± 5.45  | 2.40 ± 0.24 | 2.83 ± 0.36 |
| +XE991 and<br>N/P/Q Ca <sup>2+</sup><br>channel<br>inhibitors 20 Hz<br>(n=6)  | 81.67 ± 6.23* | 77.06 ± 6.57* | 2.88 ± 0.32 | 3.28 ± 0.28 |
| Control 50 Hz<br>(n=6)                                                        | 86.50 ± 5.62  | 76.83 ± 6.11  | 2.68 ± 0.37 | 3.08 ± 0.36 |
| +XE991 and<br>N/P/Q Ca <sup>2+</sup><br>channel<br>inhibitors 50 Hz<br>(n=6)  | 68.52 ± 5.69* | 62.05 ± 5.12* | 3.1 ± 0.29  | 3.87 ± 0.31 |
| Control 100 Hz<br>(n=5)                                                       | 88.00 ± 5.17  | 67.20 ± 5.54  | 2.36 ± 0.32 | 3.22 ± 0.38 |
| +XE991 and<br>N/P/Q Ca <sup>2+</sup><br>channel<br>inhibitors 100<br>Hz (n=5) | 64.47 ± 9.22* | 59.20 ± 5.08* | 2.70 ± 0.30 | 3.60 ± 0.36 |

**Supplementary Table 2:** The mean and standard error of mean values for the amplitude and half-width of the 1<sup>st</sup> and 20<sup>th</sup> action potential (AP) in a train elicited at frequencies ranging from 1 Hz – 100 Hz under control conditions or when BAPTA (10 mM or 20 mM) was incorporated in the patch pipette and after subsequent application of 3  $\mu$ M XE991 or 10  $\mu$ M Linopirdine or 3  $\mu$ M XE991 together with 100 nM  $\omega$ -conotoxin GVIA and 100 nM  $\omega$ -agatoxin IVA. The numbers of observations per group are shown in parenthesis. Asterisks (\*) indicate significance at  $p < 0.05$  when compared with the appropriate controls.

**Supplementary Table 3.**

| Conductance                           | Peak Conductance (S/cm <sup>2</sup> ) | V <sub>1/2</sub> activation (mV) | V <sub>1/2</sub> inactivation (mV) | Reference                            |
|---------------------------------------|---------------------------------------|----------------------------------|------------------------------------|--------------------------------------|
| Na <sup>+</sup>                       | 0.12                                  | -40.4                            | -86.8                              | Engel and Jonas (2005) <sup>44</sup> |
| Delayed rectifier type K <sup>+</sup> | 0.001                                 | 13                               |                                    | Shah et al., (2008) <sup>39</sup>    |
| A-type K <sup>+</sup>                 | 0.01                                  | 11                               | -56                                | Shah et al., (2008) <sup>39</sup>    |
| Inward rectifier type K <sup>+</sup>  | 0.021                                 | -98.92                           |                                    | Stegen et al., (2012) <sup>57</sup>  |
| K <sub>v</sub> 7                      | 0.005                                 | -70                              |                                    | Data from this manuscript            |
| Ca <sup>2+</sup>                      | 0.6                                   | -14                              | -40.11                             | Shah et al., (2008) <sup>39</sup>    |

**Supplementary Table 3:** Selected properties of the conductances used in our computational model. The complete set of files are available on ModelDB (<https://senselab.med.yale.edu/modeldb/> accession no. 245417). The Na<sup>+</sup> conductance kinetics was implemented using the fitting parameters reported in Engel and Jonas (2005)<sup>44</sup>. The deactivation time constant of the Ca<sup>2+</sup> conductance was set to 50 ms. For experimental values that were obtained at room temperature, a Q10 value of 5 was used.
